# Supplementary material
Source: PubMed Central journal article supplement (PMC5817477)
Supplement: jama-318-33-s002.pdf [file jama-318-33-s002.pdf]

## Supplementary Online Content

Lane W, Bailey TS, Gerety G, et al. Effect of insulin degludec vs insulin glargine u100 on hypoglycemia in patients with type 1 diabetes: the SWITCH 1 randomized clinical trial. *JAMA*. doi:10.1001/jama.2017.7115

**eFigure 1.** Trial design

**eFigure 2.** Hypoglycemia definition used in this trial

**eFigure 3.** Hierarchical analysis model

**eFigure 4.** Sensitivity analyses for the number of overall symptomatic and nocturnal symptomatic hypoglycemic episodes in the maintenance periods

**eFigure 5.** Self-measured blood glucose (SMBG) over time

**eTable 1.** Basal insulin titration algorithm

**eTable 2.** Bolus insulin titration algorithm

**eTable 3.** Medical Dictionary for Regulatory Activities (MedDRA) predefined search of safety data

**eTable 4.** Multiple imputation tipping analysis for primary endpoint

**eTable 5.** Summary of mean basal, bolus, and total insulin doses

**eTable 6.** Summary of adverse events occurring during treatment periods 1 and 2

This supplementary material has been provided by the authors to give readers additional information about their work.

**eFigure 1. Trial design**

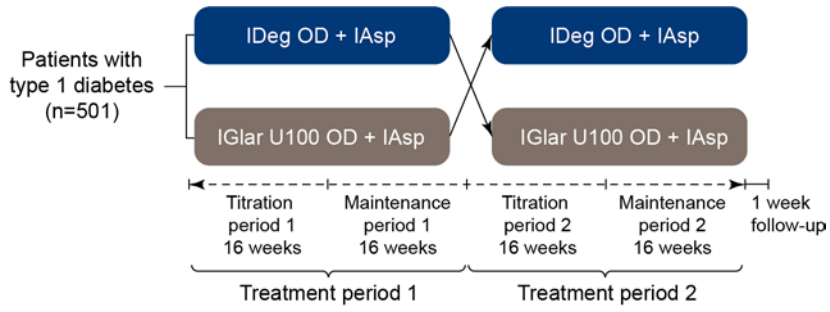

IAsp, insulin aspart; IDeg, insulin degludec; IGlar U100, insulin glargine 100 U/mL; OD, once daily

**eFigure 2. Hypoglycemia definition used in this trial**

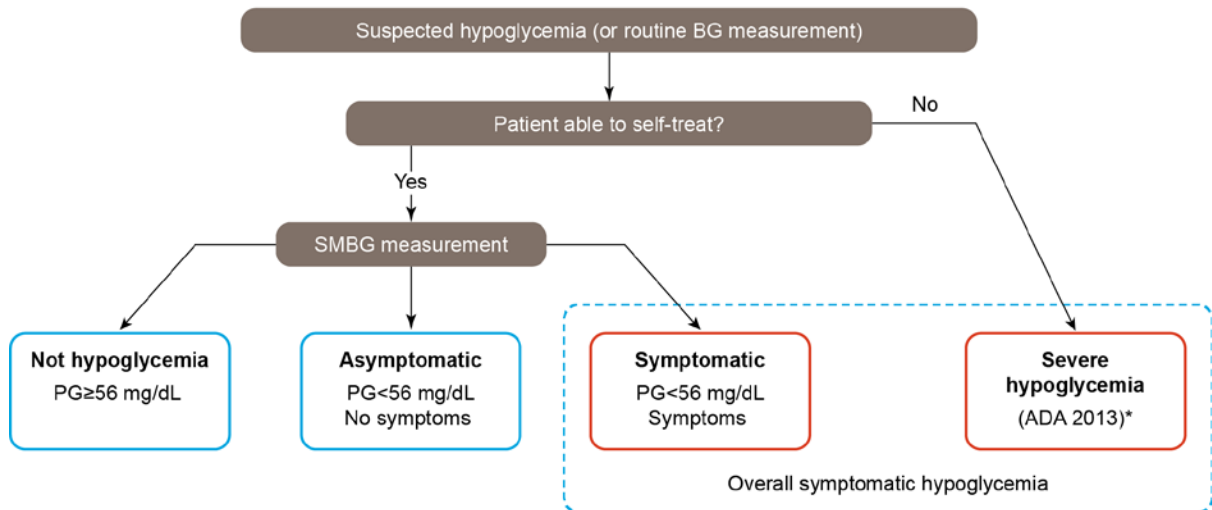

\*An episode requiring assistance of another person to actively administer carbohydrate, glucagon, or take other corrective actions and/or neurological recovery following the return of plasma glucose to normal (ADA 2013; Seaquist et al. *Diabetes Care*. 2013;36(5):1384-1395). All episodes of severe hypoglycemia were confirmed by an external adjudication committee. Nocturnal episodes were defined as episodes occurring between 00:01 and 05:59 (both inclusive). Blue dashed box signifies endpoints included as confirmatory endpoints. To convert glucose to mmol/L, multiply by 0.0555. ADA, American Diabetes Association; BG, blood glucose; PG, plasma glucose; SMBG, self-measured blood glucose.

**eFigure 3: Hierarchical analysis model**

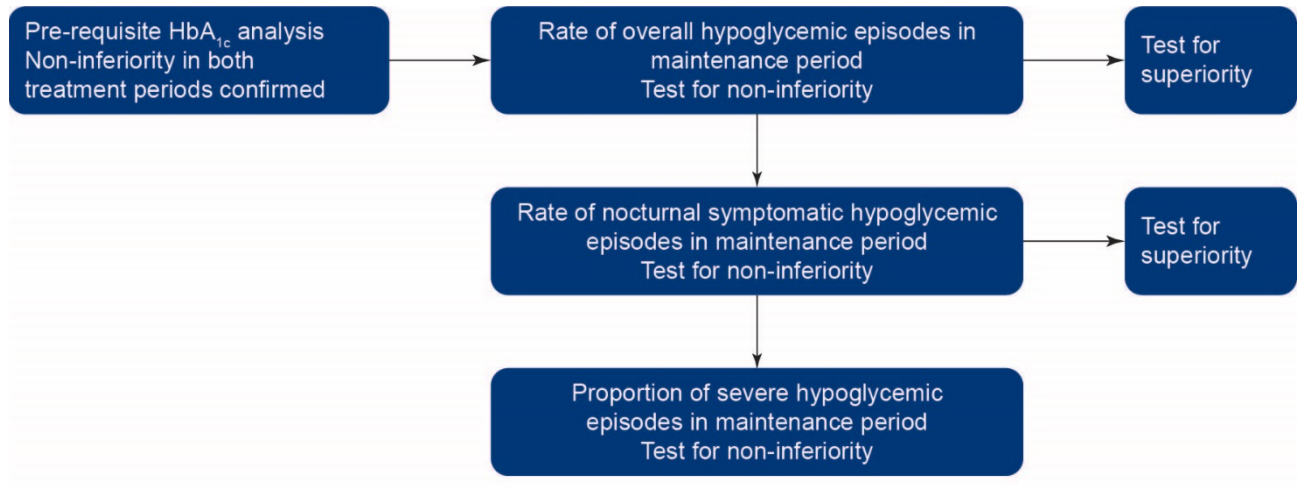

**eFigure 4. Sensitivity analyses for the number of overall symptomatic and nocturnal symptomatic hypoglycemic episodes in the maintenance periods**

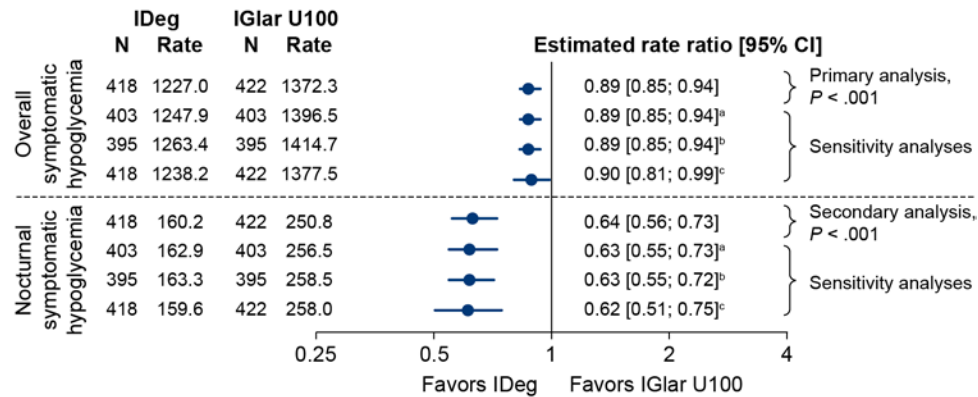

All episodes of severe hypoglycemia were confirmed by external adjudication committee. Estimated rates are least squares mean in events per 100 PYE; N, number of patients contributing to the analysis. <sup>a</sup>Poisson model on subset of patients with exposure in both maintenance periods; <sup>b</sup>Poisson model on the completer analysis set; <sup>c</sup>Negative binomial model.

CI, confidence interval; IDeg, insulin degludec; IGlar U100, insulin glargine 100 U/mL; PYE, patient-years of exposure.

**eFigure 5: Self-measured blood glucose (SMBG) over time**

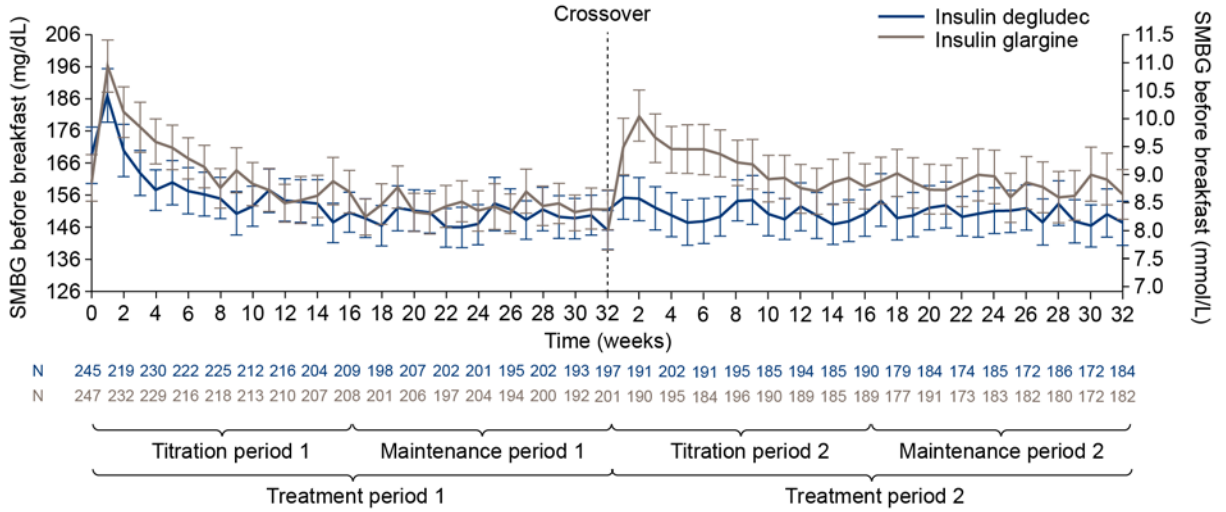

Data are mean  $\pm$  95% confidence intervals.

**eTable 1. Basal insulin titration algorithm**

| <b>Lowest pre-breakfast blood glucose measurement<sup>a</sup></b> |               | <b>Adjustment</b> |
|-------------------------------------------------------------------|---------------|-------------------|
| <b>mg/dL</b>                                                      | <b>mmol/L</b> | <b>Units</b>      |
| <56                                                               | <3.1          | -4                |
| 56-70                                                             | 3.1-3.9       | -2                |
| 71-90                                                             | 4.0-5.0       | 0                 |
| 91-180                                                            | 5.1-10.0      | +2                |
| 181-270                                                           | 10.1-15.0     | +4                |
| >270                                                              | >15.0         | +6                |

<sup>a</sup>Once-weekly titration based on the lowest of 3 consecutive days' measurements.

**eTable 2. Bolus insulin titration algorithm**

| Preprandial blood glucose measurement <sup>a</sup> |        | Adjustment | Rules for adjustment                          |
|----------------------------------------------------|--------|------------|-----------------------------------------------|
| mmol/L                                             | mg/dL  | Units      |                                               |
| <4.0                                               | <71    | -1         | ≥1 SMBG below target                          |
| 4.0–6.0                                            | 71–108 | 0          | 0–1 SMBG above target<br>No SMBG below target |
| >6.0                                               | >108   | +1         | ≥1 SMBG above target<br>No SMBG below target  |

<sup>a</sup>Twice-weekly titration based on the last 3 or 4 previous days.  
SMBG, self-measured blood glucose.



**eTable 3. Medical Dictionary for Regulatory Activities (MedDRA) predefined search of safety data**

| <b>Standardized MedDRA queries (SMQ)</b> | <b>Preferred term</b>   | <b>Term scope text</b> |
|------------------------------------------|-------------------------|------------------------|
| Accidents and injuries (SMQ)             | Abdomen crushing        | Narrow                 |
| Accidents and injuries (SMQ)             | Abdominal injury        | Narrow                 |
| Accidents and injuries (SMQ)             | Accident                | Narrow                 |
| Accidents and injuries (SMQ)             | Accident at home        | Narrow                 |
| Accidents and injuries (SMQ)             | Accident at work        | Narrow                 |
| Accidents and injuries (SMQ)             | Accidental death        | Narrow                 |
| Accidents and injuries (SMQ)             | Acetabulum fracture     | Narrow                 |
| Accidents and injuries (SMQ)             | Acoustic shock          | Narrow                 |
| Accidents and injuries (SMQ)             | Acrotrophodynia         | Broad                  |
| Accidents and injuries (SMQ)             | Adrenal gland injury    | Narrow                 |
| Accidents and injuries (SMQ)             | Anal injury             | Narrow                 |
| Accidents and injuries (SMQ)             | Animal bite             | Broad                  |
| Accidents and injuries (SMQ)             | Ankle fracture          | Narrow                 |
| Accidents and injuries (SMQ)             | Aortic injury           | Narrow                 |
| Accidents and injuries (SMQ)             | Aortic rupture          | Narrow                 |
| Accidents and injuries (SMQ)             | Aponeurosis contusion   | Narrow                 |
| Accidents and injuries (SMQ)             | Arterial injury         | Narrow                 |
| Accidents and injuries (SMQ)             | Arterial rupture        | Narrow                 |
| Accidents and injuries (SMQ)             | Atrial rupture          | Narrow                 |
| Accidents and injuries (SMQ)             | Atypical femur fracture | Narrow                 |
| Accidents and injuries (SMQ)             | Atypical fracture       | Narrow                 |

|                              |                              |        |
|------------------------------|------------------------------|--------|
| (SMQ)                        |                              |        |
| Accidents and injuries (SMQ) | Avulsion fracture            | Narrow |
| Accidents and injuries (SMQ) | Axillary nerve injury        | Narrow |
| Accidents and injuries (SMQ) | Back injury                  | Narrow |
| Accidents and injuries (SMQ) | Bile duct stenosis traumatic | Narrow |
| Accidents and injuries (SMQ) | Bladder injury               | Narrow |
| Accidents and injuries (SMQ) | Bladder perforation          | Narrow |
| Accidents and injuries (SMQ) | Blast injury                 | Narrow |
| Accidents and injuries (SMQ) | Blindness traumatic          | Narrow |
| Accidents and injuries (SMQ) | Bone contusion               | Narrow |
| Accidents and injuries (SMQ) | Bone fissure                 | Narrow |
| Accidents and injuries (SMQ) | Bone fragmentation           | Narrow |
| Accidents and injuries (SMQ) | Bowman's membrane injury     | Narrow |
| Accidents and injuries (SMQ) | Brachial plexus injury       | Narrow |
| Accidents and injuries (SMQ) | Brain contusion              | Narrow |
| Accidents and injuries (SMQ) | Breast injury                | Narrow |
| Accidents and injuries (SMQ) | Burn oral cavity             | Narrow |
| Accidents and injuries (SMQ) | Burns first degree           | Narrow |
| Accidents and injuries (SMQ) | Burns fourth degree          | Narrow |
| Accidents and injuries (SMQ) | Burns second degree          | Narrow |
| Accidents and injuries (SMQ) | Burns third degree           | Narrow |
| Accidents and injuries (SMQ) | Bursa injury                 | Narrow |
| Accidents and injuries (SMQ) | Buttock crushing             | Narrow |
| Accidents and injuries (SMQ) | Cardiac contusion            | Narrow |

|                                          |                             |                        |
|------------------------------------------|-----------------------------|------------------------|
| (SMQ)                                    |                             |                        |
| Accidents and injuries (SMQ)             | Cartilage injury            | Narrow                 |
| Accidents and injuries (SMQ)             | Cataract traumatic          | Narrow                 |
| Accidents and injuries (SMQ)             | Cervical vertebral fracture | Narrow                 |
| Accidents and injuries (SMQ)             | Chance fracture             | Narrow                 |
| Accidents and injuries (SMQ)             | Chemical burn of skin       | Narrow                 |
| Accidents and injuries (SMQ)             | Chemical burns of eye       | Narrow                 |
| Accidents and injuries (SMQ)             | Chemical eye injury         | Narrow                 |
| Accidents and injuries (SMQ)             | Chemical injury             | Narrow                 |
| Accidents and injuries (SMQ)             | Chemical iritis             | Narrow                 |
| Accidents and injuries (SMQ)             | Chest crushing              | Narrow                 |
| Accidents and injuries (SMQ)             | Chest injury                | Narrow                 |
| Accidents and injuries (SMQ)             | Chillblains                 | Broad                  |
| Accidents and injuries (SMQ)             | Clavicle fracture           | Narrow                 |
| Accidents and injuries (SMQ)             | Closed globe injury         | Narrow                 |
| <b>Standardized MedDRA queries (SMQ)</b> | <b>Preferred term</b>       | <b>Term scope text</b> |
| Accidents and injuries (SMQ)             | Cold exposure injury        | Broad                  |
| Accidents and injuries (SMQ)             | Colon injury                | Narrow                 |
| Accidents and injuries (SMQ)             | Comminuted fracture         | Narrow                 |
| Accidents and injuries (SMQ)             | Commotio retinae            | Narrow                 |
| Accidents and injuries (SMQ)             | Complicated fracture        | Narrow                 |
| Accidents and injuries (SMQ)             | Compression fracture        | Narrow                 |
| Accidents and injuries (SMQ)             | Concussion                  | Narrow                 |
| Accidents and injuries (SMQ)             | Conjunctival abrasion       | Narrow                 |

|                              |                                |        |
|------------------------------|--------------------------------|--------|
| (SMQ)                        |                                |        |
| Accidents and injuries (SMQ) | Conjunctival laceration        | Narrow |
| Accidents and injuries (SMQ) | Contusion                      | Narrow |
| Accidents and injuries (SMQ) | Corneal abrasion               | Narrow |
| Accidents and injuries (SMQ) | Corneal perforation            | Broad  |
| Accidents and injuries (SMQ) | Corrosive oropharyngeal injury | Narrow |
| Accidents and injuries (SMQ) | Cranial nerve injury           | Narrow |
| Accidents and injuries (SMQ) | Craniocerebral injury          | Narrow |
| Accidents and injuries (SMQ) | Crush injury                   | Narrow |
| Accidents and injuries (SMQ) | Crush syndrome                 | Narrow |
| Accidents and injuries (SMQ) | Crushing injury of trunk       | Narrow |
| Accidents and injuries (SMQ) | Deafness traumatic             | Narrow |
| Accidents and injuries (SMQ) | Decapitation                   | Narrow |
| Accidents and injuries (SMQ) | Deep dissecting hematoma       | Broad  |
| Accidents and injuries (SMQ) | Diaphragmatic injury           | Narrow |
| Accidents and injuries (SMQ) | Diaphragmatic rupture          | Narrow |
| Accidents and injuries (SMQ) | Diffuse axonal injury          | Narrow |
| Accidents and injuries (SMQ) | Dislocation of sternum         | Narrow |
| Accidents and injuries (SMQ) | Dislocation of vertebra        | Narrow |
| Accidents and injuries (SMQ) | Drowning                       | Narrow |
| Accidents and injuries (SMQ) | Dural tear                     | Narrow |
| Accidents and injuries (SMQ) | Ear abrasion                   | Narrow |
| Accidents and injuries (SMQ) | Ear canal abrasion             | Narrow |
| Accidents and injuries       | Ear canal injury               | Narrow |

|                              |                              |        |
|------------------------------|------------------------------|--------|
| (SMQ)                        |                              |        |
| Accidents and injuries (SMQ) | Ear canal stenosis traumatic | Narrow |
| Accidents and injuries (SMQ) | Ear injury                   | Narrow |
| Accidents and injuries (SMQ) | Electric injury              | Narrow |
| Accidents and injuries (SMQ) | Electric shock               | Narrow |
| Accidents and injuries (SMQ) | Electrocution                | Narrow |
| Accidents and injuries (SMQ) | Enophthalmos traumatic       | Narrow |
| Accidents and injuries (SMQ) | Epidural hemorrhage          | Broad  |
| Accidents and injuries (SMQ) | Epiphyseal fracture          | Narrow |
| Accidents and injuries (SMQ) | Epiphyseal injury            | Narrow |
| Accidents and injuries (SMQ) | Epiphysiolysis               | Broad  |
| Accidents and injuries (SMQ) | Excoriation                  | Broad  |
| Accidents and injuries (SMQ) | External genitalia crushing  | Narrow |
| Accidents and injuries (SMQ) | Extradural hematoma          | Broad  |
| Accidents and injuries (SMQ) | Eye burns                    | Narrow |
| Accidents and injuries (SMQ) | Eye contusion                | Narrow |
| Accidents and injuries (SMQ) | Eye injury                   | Narrow |
| Accidents and injuries (SMQ) | Eye luxation                 | Broad  |
| Accidents and injuries (SMQ) | Eyeball avulsion             | Narrow |
| Accidents and injuries (SMQ) | Eyelash injury               | Narrow |
| Accidents and injuries (SMQ) | Eyelid contusion             | Narrow |
| Accidents and injuries (SMQ) | Eyelid hematoma              | Narrow |
| Accidents and injuries (SMQ) | Eyelid injury                | Narrow |
| Accidents and injuries       | Face crushing                | Narrow |

|                                          |                                          |                        |
|------------------------------------------|------------------------------------------|------------------------|
| (SMQ)                                    |                                          |                        |
| Accidents and injuries (SMQ)             | Face injury                              | Narrow                 |
| Accidents and injuries (SMQ)             | Facial bones fracture                    | Narrow                 |
| Accidents and injuries (SMQ)             | Facial nerve injury due to birth trauma  | Narrow                 |
| Accidents and injuries (SMQ)             | Fall                                     | Narrow                 |
| Accidents and injuries (SMQ)             | Femoral neck fracture                    | Narrow                 |
| Accidents and injuries (SMQ)             | Femoral nerve injury                     | Narrow                 |
| Accidents and injuries (SMQ)             | Femur fracture                           | Narrow                 |
| <b>Standardized MedDRA queries (SMQ)</b> | <b>Preferred term</b>                    | <b>Term scope text</b> |
| Accidents and injuries (SMQ)             | Fibula fracture                          | Narrow                 |
| Accidents and injuries (SMQ)             | Flail chest                              | Narrow                 |
| Accidents and injuries (SMQ)             | Foot fracture                            | Narrow                 |
| Accidents and injuries (SMQ)             | Forearm fracture                         | Narrow                 |
| Accidents and injuries (SMQ)             | Foreign body aspiration                  | Broad                  |
| Accidents and injuries (SMQ)             | Foreign body in eye                      | Narrow                 |
| Accidents and injuries (SMQ)             | Fracture                                 | Narrow                 |
| Accidents and injuries (SMQ)             | Fracture displacement                    | Narrow                 |
| Accidents and injuries (SMQ)             | Fracture of clavicle due to birth trauma | Narrow                 |
| Accidents and injuries (SMQ)             | Fracture of penis                        | Narrow                 |
| Accidents and injuries (SMQ)             | Fracture pain                            | Broad                  |
| Accidents and injuries (SMQ)             | Fractured coccyx                         | Narrow                 |
| Accidents and injuries (SMQ)             | Fractured ischium                        | Narrow                 |
| Accidents and injuries (SMQ)             | Fractured sacrum                         | Narrow                 |
| Accidents and injuries (SMQ)             | Fractured skull depressed                | Narrow                 |

|                              |                         |        |
|------------------------------|-------------------------|--------|
| (SMQ)                        |                         |        |
| Accidents and injuries (SMQ) | Frostbite               | Broad  |
| Accidents and injuries (SMQ) | Gallbladder injury      | Narrow |
| Accidents and injuries (SMQ) | Gallbladder perforation | Broad  |
| Accidents and injuries (SMQ) | Gastrointestinal injury | Narrow |
| Accidents and injuries (SMQ) | Genital contusion       | Narrow |
| Accidents and injuries (SMQ) | Genital injury          | Narrow |
| Accidents and injuries (SMQ) | Gingival injury         | Narrow |
| Accidents and injuries (SMQ) | Glaucoma traumatic      | Narrow |
| Accidents and injuries (SMQ) | Greenstick fracture     | Narrow |
| Accidents and injuries (SMQ) | Gun shot wound          | Narrow |
| Accidents and injuries (SMQ) | Hematuria traumatic     | Narrow |
| Accidents and injuries (SMQ) | Hemothorax              | Broad  |
| Accidents and injuries (SMQ) | Hand fracture           | Narrow |
| Accidents and injuries (SMQ) | Head injury             | Narrow |
| Accidents and injuries (SMQ) | Heart injury            | Broad  |
| Accidents and injuries (SMQ) | Heat cramps             | Broad  |
| Accidents and injuries (SMQ) | Heat exhaustion         | Broad  |
| Accidents and injuries (SMQ) | Heat stroke             | Broad  |
| Accidents and injuries (SMQ) | Hepatic rupture         | Narrow |
| Accidents and injuries (SMQ) | Hernia perforation      | Narrow |
| Accidents and injuries (SMQ) | Hip fracture            | Narrow |
| Accidents and injuries (SMQ) | Human bite              | Broad  |
| Accidents and injuries (SMQ) | Humerus fracture        | Narrow |

|                              |                                               |                        |
|------------------------------|-----------------------------------------------|------------------------|
| (SMQ)                        |                                               |                        |
| Accidents and injuries (SMQ) | Hyperthermia                                  | Broad                  |
| Accidents and injuries (SMQ) | Hyphemia                                      | Narrow                 |
| Accidents and injuries (SMQ) | Hypothermia                                   | Broad                  |
| Accidents and injuries (SMQ) | IIIrd nerve injury                            | Narrow                 |
| Accidents and injuries (SMQ) | IVth nerve injury                             | Narrow                 |
| Accidents and injuries (SMQ) | Ilium fracture                                | Narrow                 |
| Accidents and injuries (SMQ) | Impacted fracture                             | Narrow                 |
| Accidents and injuries (SMQ) | Inguinal hernia perforation                   | Narrow                 |
| Accidents and injuries (SMQ) | Injury                                        | Narrow                 |
| Accidents and injuries (SMQ) | Injury corneal                                | Narrow                 |
| Accidents and injuries (SMQ) | Injury to brachial plexus due to birth trauma | Narrow                 |
| Accidents and injuries (SMQ) | Internal injury                               | Narrow                 |
| Accidents and injuries (SMQ) | Intervertebral disc injury                    | Narrow                 |
| Accidents and injuries (SMQ) | Iris injury                                   | Narrow                 |
| Accidents and injuries (SMQ) | Jaw fracture                                  | Narrow                 |
| Accidents and injuries (SMQ) | Joint dislocation                             | Narrow                 |
| Accidents and injuries (SMQ) | Joint hyperextension                          | Narrow                 |
| Accidents and injuries (SMQ) | Joint injury                                  | Narrow                 |
| Accidents and injuries (SMQ) | Keratorhexis                                  | Broad                  |
| Accidents and injuries (SMQ) | Kidney contusion                              | Narrow                 |
| Accidents and injuries (SMQ) | Kidney rupture                                | Narrow                 |
| Accidents and injuries (SMQ) | Laceration                                    | Narrow                 |
| <b>Standardized MedDRA</b>   | <b>Preferred term</b>                         | <b>Term scope text</b> |



| <b>queries (SMQ)</b>         |                           |        |
|------------------------------|---------------------------|--------|
| Accidents and injuries (SMQ) | Laryngeal injury          | Narrow |
| Accidents and injuries (SMQ) | Lens dislocation          | Broad  |
| Accidents and injuries (SMQ) | Lenticular injury         | Narrow |
| Accidents and injuries (SMQ) | Ligament injury           | Narrow |
| Accidents and injuries (SMQ) | Ligament rupture          | Narrow |
| Accidents and injuries (SMQ) | Ligament sprain           | Narrow |
| Accidents and injuries (SMQ) | Limb crushing injury      | Narrow |
| Accidents and injuries (SMQ) | Limb fracture             | Narrow |
| Accidents and injuries (SMQ) | Limb injury               | Narrow |
| Accidents and injuries (SMQ) | Limb reattachment surgery | Narrow |
| Accidents and injuries (SMQ) | Limb traumatic amputation | Narrow |
| Accidents and injuries (SMQ) | Lip injury                | Narrow |
| Accidents and injuries (SMQ) | Liver contusion           | Narrow |
| Accidents and injuries (SMQ) | Liver injury              | Narrow |
| Accidents and injuries (SMQ) | Lower limb fracture       | Narrow |
| Accidents and injuries (SMQ) | Lumbar vertebral fracture | Narrow |
| Accidents and injuries (SMQ) | Lumbosacral plexus injury | Narrow |
| Accidents and injuries (SMQ) | Lung perforation          | Broad  |
| Accidents and injuries (SMQ) | Lymphatic duct injury     | Narrow |
| Accidents and injuries (SMQ) | Median nerve injury       | Narrow |
| Accidents and injuries (SMQ) | Meniscus cyst             | Narrow |
| Accidents and injuries (SMQ) | Meniscus injury           | Narrow |
| Accidents and injuries (SMQ) | Metallosis of globe       | Broad  |

|                              |                               |        |
|------------------------------|-------------------------------|--------|
| (SMQ)                        |                               |        |
| Accidents and injuries (SMQ) | Mouth injury                  | Narrow |
| Accidents and injuries (SMQ) | Multiple fractures            | Narrow |
| Accidents and injuries (SMQ) | Multiple injuries             | Narrow |
| Accidents and injuries (SMQ) | Muscle contusion              | Narrow |
| Accidents and injuries (SMQ) | Muscle injury                 | Narrow |
| Accidents and injuries (SMQ) | Muscle reattachment           | Narrow |
| Accidents and injuries (SMQ) | Muscle rupture                | Narrow |
| Accidents and injuries (SMQ) | Muscle strain                 | Narrow |
| Accidents and injuries (SMQ) | Musculocutaneous nerve injury | Narrow |
| Accidents and injuries (SMQ) | Musculoskeletal injury        | Narrow |
| Accidents and injuries (SMQ) | Myocardial rupture            | Narrow |
| Accidents and injuries (SMQ) | Nail avulsion                 | Narrow |
| Accidents and injuries (SMQ) | Nail injury                   | Narrow |
| Accidents and injuries (SMQ) | Near drowning                 | Narrow |
| Accidents and injuries (SMQ) | Neck crushing                 | Narrow |
| Accidents and injuries (SMQ) | Neck injury                   | Narrow |
| Accidents and injuries (SMQ) | Nerve compression             | Broad  |
| Accidents and injuries (SMQ) | Nerve injury                  | Narrow |
| Accidents and injuries (SMQ) | Nerve root injury             | Narrow |
| Accidents and injuries (SMQ) | Nerve root injury cervical    | Narrow |
| Accidents and injuries (SMQ) | Nerve root injury lumbar      | Narrow |
| Accidents and injuries (SMQ) | Nerve root injury sacral      | Narrow |
| Accidents and injuries (SMQ) | Nerve root injury thoracic    | Narrow |

|                                          |                               |                        |
|------------------------------------------|-------------------------------|------------------------|
| (SMQ)                                    |                               |                        |
| Accidents and injuries (SMQ)             | Esophageal injury             | Narrow                 |
| Accidents and injuries (SMQ)             | Esophageal rupture            | Narrow                 |
| Accidents and injuries (SMQ)             | Open fracture                 | Narrow                 |
| Accidents and injuries (SMQ)             | Open globe injury             | Narrow                 |
| Accidents and injuries (SMQ)             | Optic nerve injury            | Narrow                 |
| Accidents and injuries (SMQ)             | Optic pathway injury          | Narrow                 |
| Accidents and injuries (SMQ)             | Osteochondral fracture        | Narrow                 |
| Accidents and injuries (SMQ)             | Pancreatic duct rupture       | Narrow                 |
| Accidents and injuries (SMQ)             | Pancreatic injury             | Narrow                 |
| Accidents and injuries (SMQ)             | Parasympathetic nerve injury  | Narrow                 |
| Accidents and injuries (SMQ)             | Patella fracture              | Narrow                 |
| Accidents and injuries (SMQ)             | Pellegrini Stieda disease     | Narrow                 |
| Accidents and injuries (SMQ)             | Pelvic fracture               | Narrow                 |
| Accidents and injuries (SMQ)             | Pelvic organ injury           | Narrow                 |
| Accidents and injuries (SMQ)             | Penetrating abdominal trauma  | Narrow                 |
| Accidents and injuries (SMQ)             | Penetrating eye injury repair | Narrow                 |
| <b>Standardized MedDRA queries (SMQ)</b> | <b>Preferred term</b>         | <b>Term scope text</b> |
| Accidents and injuries (SMQ)             | Penile contusion              | Narrow                 |
| Accidents and injuries (SMQ)             | Penis injury                  | Narrow                 |
| Accidents and injuries (SMQ)             | Penis reattachment            | Narrow                 |
| Accidents and injuries (SMQ)             | Perforation bile duct         | Broad                  |
| Accidents and injuries (SMQ)             | Perineal injury               | Narrow                 |
| Accidents and injuries                   | Peripheral nerve injury       | Narrow                 |

|                              |                                                     |        |
|------------------------------|-----------------------------------------------------|--------|
| (SMQ)                        |                                                     |        |
| Accidents and injuries (SMQ) | Peritoneal perforation                              | Broad  |
| Accidents and injuries (SMQ) | Peroneal nerve injury                               | Narrow |
| Accidents and injuries (SMQ) | Pharyngeal injury                                   | Narrow |
| Accidents and injuries (SMQ) | Photoelectric conjunctivitis                        | Narrow |
| Accidents and injuries (SMQ) | Pneumothorax traumatic                              | Narrow |
| Accidents and injuries (SMQ) | Post-concussion syndrome                            | Broad  |
| Accidents and injuries (SMQ) | Post-traumatic headache                             | Narrow |
| Accidents and injuries (SMQ) | Post-traumatic neck syndrome                        | Narrow |
| Accidents and injuries (SMQ) | Post-traumatic osteoporosis                         | Broad  |
| Accidents and injuries (SMQ) | Post-traumatic pain                                 | Broad  |
| Accidents and injuries (SMQ) | Posterior capsule rupture                           | Narrow |
| Accidents and injuries (SMQ) | Posterior tibial nerve injury                       | Narrow |
| Accidents and injuries (SMQ) | Prevertebral soft tissue swelling of cervical space | Broad  |
| Accidents and injuries (SMQ) | Product package associated injury                   | Narrow |
| Accidents and injuries (SMQ) | Pubis fracture                                      | Narrow |
| Accidents and injuries (SMQ) | Pulmonary contusion                                 | Narrow |
| Accidents and injuries (SMQ) | Radial head dislocation                             | Narrow |
| Accidents and injuries (SMQ) | Radial nerve injury                                 | Narrow |
| Accidents and injuries (SMQ) | Radius fracture                                     | Narrow |
| Accidents and injuries (SMQ) | Rectal injury                                       | Narrow |
| Accidents and injuries (SMQ) | Renal injury                                        | Broad  |
| Accidents and injuries (SMQ) | Repair of diaphragm injury                          | Narrow |
| Accidents and injuries       | Retinal detachment                                  | Broad  |

|                              |                                 |        |
|------------------------------|---------------------------------|--------|
| (SMQ)                        |                                 |        |
| Accidents and injuries (SMQ) | Retinal injury                  | Narrow |
| Accidents and injuries (SMQ) | Retinal tear                    | Broad  |
| Accidents and injuries (SMQ) | Rib fracture                    | Narrow |
| Accidents and injuries (SMQ) | Road traffic accident           | Narrow |
| Accidents and injuries (SMQ) | Sacroiliac fracture             | Narrow |
| Accidents and injuries (SMQ) | Scapula fracture                | Narrow |
| Accidents and injuries (SMQ) | Scapulothoracic dissociation    | Narrow |
| Accidents and injuries (SMQ) | Sciatic nerve injury            | Narrow |
| Accidents and injuries (SMQ) | Scratch                         | Narrow |
| Accidents and injuries (SMQ) | Sinus tarsi syndrome            | Narrow |
| Accidents and injuries (SMQ) | Skeletal injury                 | Narrow |
| Accidents and injuries (SMQ) | Skin abrasion                   | Broad  |
| Accidents and injuries (SMQ) | Skin injury                     | Narrow |
| Accidents and injuries (SMQ) | Skull fracture                  | Narrow |
| Accidents and injuries (SMQ) | Skull fractured base            | Narrow |
| Accidents and injuries (SMQ) | Snake bite                      | Broad  |
| Accidents and injuries (SMQ) | Soft tissue injury              | Narrow |
| Accidents and injuries (SMQ) | Spinal column injury            | Narrow |
| Accidents and injuries (SMQ) | Spinal compression fracture     | Narrow |
| Accidents and injuries (SMQ) | Spinal cord injury              | Narrow |
| Accidents and injuries (SMQ) | Spinal cord injury cauda equina | Narrow |
| Accidents and injuries (SMQ) | Spinal cord injury cervical     | Narrow |
| Accidents and injuries (SMQ) | Spinal cord injury lumbar       | Narrow |

|                                          |                                |                        |
|------------------------------------------|--------------------------------|------------------------|
| (SMQ)                                    |                                |                        |
| Accidents and injuries (SMQ)             | Spinal cord injury sacral      | Narrow                 |
| Accidents and injuries (SMQ)             | Spinal cord injury thoracic    | Narrow                 |
| Accidents and injuries (SMQ)             | Spinal epidural hematoma       | Broad                  |
| Accidents and injuries (SMQ)             | Spinal epidural hemorrhage     | Broad                  |
| Accidents and injuries (SMQ)             | Spinal fracture                | Narrow                 |
| Accidents and injuries (SMQ)             | Spinal fusion fracture         | Narrow                 |
| Accidents and injuries (SMQ)             | Spinal shock                   | Narrow                 |
| Accidents and injuries (SMQ)             | Spinal subarachnoid hemorrhage | Narrow                 |
| Accidents and injuries (SMQ)             | Spinal subdural hematoma       | Broad                  |
| <b>Standardized MedDRA queries (SMQ)</b> | <b>Preferred term</b>          | <b>Term scope text</b> |
| Accidents and injuries (SMQ)             | Spleen contusion               | Narrow                 |
| Accidents and injuries (SMQ)             | Splenic injury                 | Narrow                 |
| Accidents and injuries (SMQ)             | Splenic rupture                | Narrow                 |
| Accidents and injuries (SMQ)             | Splenosis                      | Broad                  |
| Accidents and injuries (SMQ)             | Splinter                       | Narrow                 |
| Accidents and injuries (SMQ)             | Spondylopathy traumatic        | Narrow                 |
| Accidents and injuries (SMQ)             | Sports injury                  | Narrow                 |
| Accidents and injuries (SMQ)             | Stab wound                     | Narrow                 |
| Accidents and injuries (SMQ)             | Sternal fracture               | Narrow                 |
| Accidents and injuries (SMQ)             | Sternal injury                 | Narrow                 |
| Accidents and injuries (SMQ)             | Stress fracture                | Narrow                 |
| Accidents and injuries (SMQ)             | Struck by lightning            | Narrow                 |
| Accidents and injuries (SMQ)             | Subdural hematoma              | Broad                  |

|                              |                              |        |
|------------------------------|------------------------------|--------|
| (SMQ)                        |                              |        |
| Accidents and injuries (SMQ) | Subdural hematoma evacuation | Broad  |
| Accidents and injuries (SMQ) | Subdural hemorrhage          | Broad  |
| Accidents and injuries (SMQ) | Subretinal fluid             | Broad  |
| Accidents and injuries (SMQ) | Sunburn                      | Narrow |
| Accidents and injuries (SMQ) | Superficial injury of eye    | Narrow |
| Accidents and injuries (SMQ) | Sympathetic nerve injury     | Narrow |
| Accidents and injuries (SMQ) | Synovial rupture             | Broad  |
| Accidents and injuries (SMQ) | Tendon injury                | Narrow |
| Accidents and injuries (SMQ) | Tendon rupture               | Narrow |
| Accidents and injuries (SMQ) | Testicular injury            | Narrow |
| Accidents and injuries (SMQ) | Thermal burn                 | Narrow |
| Accidents and injuries (SMQ) | Thermal burns of eye         | Narrow |
| Accidents and injuries (SMQ) | Thoracic vertebral fracture  | Narrow |
| Accidents and injuries (SMQ) | Tibia fracture               | Narrow |
| Accidents and injuries (SMQ) | Tongue injury                | Narrow |
| Accidents and injuries (SMQ) | Tooth avulsion               | Narrow |
| Accidents and injuries (SMQ) | Tooth fracture               | Narrow |
| Accidents and injuries (SMQ) | Tooth injury                 | Narrow |
| Accidents and injuries (SMQ) | Torus fracture               | Narrow |
| Accidents and injuries (SMQ) | Tracheal injury              | Narrow |
| Accidents and injuries (SMQ) | Traumatic amputation         | Narrow |
| Accidents and injuries (SMQ) | Traumatic anuria             | Narrow |
| Accidents and injuries (SMQ) | Traumatic arthritis          | Narrow |

|                              |                                                          |        |
|------------------------------|----------------------------------------------------------|--------|
| (SMQ)                        |                                                          |        |
| Accidents and injuries (SMQ) | Traumatic arthropathy                                    | Narrow |
| Accidents and injuries (SMQ) | Traumatic arthrosis                                      | Narrow |
| Accidents and injuries (SMQ) | Traumatic coma                                           | Narrow |
| Accidents and injuries (SMQ) | Traumatic ear amputation                                 | Narrow |
| Accidents and injuries (SMQ) | Traumatic fracture                                       | Narrow |
| Accidents and injuries (SMQ) | Traumatic hematoma                                       | Narrow |
| Accidents and injuries (SMQ) | Traumatic hemorrhage                                     | Narrow |
| Accidents and injuries (SMQ) | Traumatic hemothorax                                     | Narrow |
| Accidents and injuries (SMQ) | Traumatic intracranial hemorrhage                        | Narrow |
| Accidents and injuries (SMQ) | Traumatic iritis                                         | Narrow |
| Accidents and injuries (SMQ) | Traumatic liver injury                                   | Narrow |
| Accidents and injuries (SMQ) | Traumatic lung injury                                    | Narrow |
| Accidents and injuries (SMQ) | Traumatic pancreatitis                                   | Narrow |
| Accidents and injuries (SMQ) | Traumatic renal injury                                   | Narrow |
| Accidents and injuries (SMQ) | Traumatic shock                                          | Narrow |
| Accidents and injuries (SMQ) | Traumatic spinal cord compression                        | Narrow |
| Accidents and injuries (SMQ) | Traumatic torticollis                                    | Narrow |
| Accidents and injuries (SMQ) | Traumatic ulcer                                          | Narrow |
| Accidents and injuries (SMQ) | Traumatic ulcerative granuloma with stromal eosinophilia | Broad  |
| Accidents and injuries (SMQ) | Trench foot                                              | Broad  |
| Accidents and injuries (SMQ) | Tympanic membrane perforation                            | Broad  |
| Accidents and injuries (SMQ) | Ulna fracture                                            | Narrow |
| Accidents and injuries       | Ulnar nerve injury                                       | Narrow |



|                                          |                              |                        |
|------------------------------------------|------------------------------|------------------------|
| (SMQ)                                    |                              |                        |
| Accidents and injuries (SMQ)             | Upper limb fracture          | Narrow                 |
| Accidents and injuries (SMQ)             | Ureteric injury              | Narrow                 |
| <b>Standardized MedDRA queries (SMQ)</b> | <b>Preferred term</b>        | <b>Term scope text</b> |
| Accidents and injuries (SMQ)             | Ureteric perforation         | Broad                  |
| Accidents and injuries (SMQ)             | Ureteric rupture             | Narrow                 |
| Accidents and injuries (SMQ)             | Urethral injury              | Narrow                 |
| Accidents and injuries (SMQ)             | Urethral perforation         | Broad                  |
| Accidents and injuries (SMQ)             | Urethral stricture traumatic | Narrow                 |
| Accidents and injuries (SMQ)             | Urinary bladder rupture      | Narrow                 |
| Accidents and injuries (SMQ)             | Urinary tract injury         | Narrow                 |
| Accidents and injuries (SMQ)             | Uterine perforation          | Broad                  |
| Accidents and injuries (SMQ)             | Uveal prolapse               | Broad                  |
| Accidents and injuries (SMQ)             | VIIIth nerve injury          | Narrow                 |
| Accidents and injuries (SMQ)             | VIIth nerve injury           | Narrow                 |
| Accidents and injuries (SMQ)             | VIth nerve injury            | Narrow                 |
| Accidents and injuries (SMQ)             | Vaginal laceration           | Narrow                 |
| Accidents and injuries (SMQ)             | Vaginal perforation          | Broad                  |
| Accidents and injuries (SMQ)             | Vascular injury              | Narrow                 |
| Accidents and injuries (SMQ)             | Vascular rupture             | Narrow                 |
| Accidents and injuries (SMQ)             | Vena cava injury             | Narrow                 |
| Accidents and injuries (SMQ)             | Venous injury                | Narrow                 |
| Accidents and injuries (SMQ)             | Ventricle rupture            | Narrow                 |
| Accidents and injuries (SMQ)             | Vitreous detachment          | Broad                  |

|                              |                                                                 |        |
|------------------------------|-----------------------------------------------------------------|--------|
| (SMQ)                        |                                                                 |        |
| Accidents and injuries (SMQ) | Vitreous injury                                                 | Narrow |
| Accidents and injuries (SMQ) | Vitreous loss                                                   | Broad  |
| Accidents and injuries (SMQ) | Vitreous prolapse                                               | Broad  |
| Accidents and injuries (SMQ) | Vth nerve injury                                                | Narrow |
| Accidents and injuries (SMQ) | Vulval laceration                                               | Narrow |
| Accidents and injuries (SMQ) | Vulvovaginal injury                                             | Narrow |
| Accidents and injuries (SMQ) | Wound                                                           | Broad  |
| Accidents and injuries (SMQ) | Wrist fracture                                                  | Narrow |
| Accidents and injuries (SMQ) | XIIth nerve injury                                              | Narrow |
| Accidents and injuries (SMQ) | XIth nerve injury                                               | Narrow |
| Convulsions (SMQ)            | Acquired epileptic aphasia                                      | Narrow |
| Convulsions (SMQ)            | Acute encephalitis with refractory, repetitive partial seizures | Narrow |
| Convulsions (SMQ)            | Alcoholic seizure                                               | Narrow |
| Convulsions (SMQ)            | Amygdalohippocampectomy                                         | Broad  |
| Convulsions (SMQ)            | Atonic seizures                                                 | Narrow |
| Convulsions (SMQ)            | Atypical benign partial epilepsy                                | Narrow |
| Convulsions (SMQ)            | Aura                                                            | Broad  |
| Convulsions (SMQ)            | Automatism epileptic                                            | Narrow |
| Convulsions (SMQ)            | Autonomic seizure                                               | Narrow |
| Convulsions (SMQ)            | Baltic myoclonic epilepsy                                       | Narrow |
| Convulsions (SMQ)            | Benign familial neonatal convulsions                            | Narrow |
| Convulsions (SMQ)            | Benign rolandic epilepsy                                        | Narrow |
| Convulsions (SMQ)            | Biotinidase deficiency                                          | Narrow |
| Convulsions (SMQ)            | Change in seizure presentation                                  | Narrow |
| Convulsions (SMQ)            | Clonic convulsion                                               | Narrow |
| Convulsions (SMQ)            | Complex partial seizures                                        | Narrow |
| Convulsions (SMQ)            | Convulsion in childhood                                         | Narrow |
| Convulsions (SMQ)            | Convulsion neonatal                                             | Narrow |
| Convulsions (SMQ)            | Convulsion prophylaxis                                          | Broad  |
| Convulsions (SMQ)            | Convulsions local                                               | Narrow |
| Convulsions (SMQ)            | Convulsive threshold lowered                                    | Narrow |

|                                          |                                                                 |                        |
|------------------------------------------|-----------------------------------------------------------------|------------------------|
| Convulsions (SMQ)                        | Corpus callosotomy                                              | Broad                  |
| Convulsions (SMQ)                        | Deja vu                                                         | Narrow                 |
| Convulsions (SMQ)                        | Double cortex syndrome                                          | Narrow                 |
| Convulsions (SMQ)                        | Dreamy state                                                    | Narrow                 |
| Convulsions (SMQ)                        | Drop attacks                                                    | Broad                  |
| Convulsions (SMQ)                        | Drug withdrawal convulsions                                     | Narrow                 |
| Convulsions (SMQ)                        | Early infantile epileptic encephalopathy with burst-suppression | Narrow                 |
| Convulsions (SMQ)                        | Eclampsia                                                       | Narrow                 |
| <b>Standardized MedDRA queries (SMQ)</b> | <b>Preferred term</b>                                           | <b>Term scope text</b> |
| Convulsions (SMQ)                        | Epilepsy                                                        | Narrow                 |
| Convulsions (SMQ)                        | Epileptic aura                                                  | Narrow                 |
| Convulsions (SMQ)                        | Epileptic psychosis                                             | Narrow                 |
| Convulsions (SMQ)                        | Febrile convulsion                                              | Narrow                 |
| Convulsions (SMQ)                        | Foaming at mouth                                                | Broad                  |
| Convulsions (SMQ)                        | Frontal lobe epilepsy                                           | Narrow                 |
| Convulsions (SMQ)                        | Generalized non-convulsive epilepsy                             | Narrow                 |
| Convulsions (SMQ)                        | Generalized tonic-clonic seizure                                | Narrow                 |
| Convulsions (SMQ)                        | Hyperglycemic seizure                                           | Narrow                 |
| Convulsions (SMQ)                        | Hypocalcemic seizure                                            | Narrow                 |
| Convulsions (SMQ)                        | Hypoglycemic seizure                                            | Narrow                 |
| Convulsions (SMQ)                        | Hyponatremic seizure                                            | Narrow                 |
| Convulsions (SMQ)                        | Idiopathic generalized epilepsy                                 | Narrow                 |
| Convulsions (SMQ)                        | Infantile spasms                                                | Narrow                 |
| Convulsions (SMQ)                        | Juvenile myoclonic epilepsy                                     | Narrow                 |
| Convulsions (SMQ)                        | Lafora's myoclonic epilepsy                                     | Narrow                 |
| Convulsions (SMQ)                        | Lennox-Gastaut syndrome                                         | Narrow                 |
| Convulsions (SMQ)                        | Migraine-triggered seizure                                      | Narrow                 |
| Convulsions (SMQ)                        | Molybdenum cofactor deficiency                                  | Narrow                 |
| Convulsions (SMQ)                        | Myoclonic epilepsy                                              | Narrow                 |
| Convulsions (SMQ)                        | Myoclonic epilepsy and ragged-red fibers                        | Narrow                 |
| Convulsions (SMQ)                        | Narcolepsy                                                      | Broad                  |
| Convulsions (SMQ)                        | Partial seizures                                                | Narrow                 |
| Convulsions (SMQ)                        | Partial seizures with secondary generalization                  | Narrow                 |
| Convulsions (SMQ)                        | Petit mal epilepsy                                              | Narrow                 |
| Convulsions (SMQ)                        | Polymicrogyria                                                  | Narrow                 |
| Convulsions (SMQ)                        | Post stroke epilepsy                                            | Narrow                 |
| Convulsions (SMQ)                        | Post stroke seizure                                             | Narrow                 |
| Convulsions (SMQ)                        | Post-traumatic epilepsy                                         | Narrow                 |

|                                          |                                      |                        |
|------------------------------------------|--------------------------------------|------------------------|
| Convulsions (SMQ)                        | Postictal headache                   | Narrow                 |
| Convulsions (SMQ)                        | Postictal paralysis                  | Narrow                 |
| Convulsions (SMQ)                        | Postictal psychosis                  | Narrow                 |
| Convulsions (SMQ)                        | Postictal state                      | Narrow                 |
| Convulsions (SMQ)                        | Preictal state                       | Broad                  |
| Convulsions (SMQ)                        | Psychomotor seizures                 | Narrow                 |
| Convulsions (SMQ)                        | Schizencephaly                       | Narrow                 |
| Convulsions (SMQ)                        | Seizure                              | Narrow                 |
| Convulsions (SMQ)                        | Seizure anoxic                       | Narrow                 |
| Convulsions (SMQ)                        | Seizure cluster                      | Narrow                 |
| Convulsions (SMQ)                        | Seizure like phenomena               | Narrow                 |
| Convulsions (SMQ)                        | Severe myoclonic epilepsy of infancy | Narrow                 |
| Convulsions (SMQ)                        | Simple partial seizures              | Narrow                 |
| Convulsions (SMQ)                        | Status epilepticus                   | Narrow                 |
| Convulsions (SMQ)                        | Sudden unexplained death in epilepsy | Narrow                 |
| Convulsions (SMQ)                        | Temporal lobe epilepsy               | Narrow                 |
| Convulsions (SMQ)                        | Tongue biting                        | Broad                  |
| Convulsions (SMQ)                        | Tonic clonic movements               | Narrow                 |
| Convulsions (SMQ)                        | Tonic convulsion                     | Narrow                 |
| Convulsions (SMQ)                        | Tonic posturing                      | Narrow                 |
| Convulsions (SMQ)                        | Topectomy                            | Narrow                 |
| Convulsions (SMQ)                        | Uncinate fits                        | Narrow                 |
| nmq_hypo                                 | Blood glucose decreased              | Narrow                 |
| nmq_hypo                                 | Hyperinsulinaemic hypoglycemia       | Narrow                 |
| nmq_hypo                                 | Hypoglycemia                         | Narrow                 |
| nmq_hypo                                 | Hypoglycemia neonatal                | Narrow                 |
| nmq_hypo                                 | Hypoglycemia unawareness             | Narrow                 |
| nmq_hypo                                 | Hypoglycemic coma                    | Narrow                 |
| nmq_hypo                                 | Hypoglycemic encephalopathy          | Narrow                 |
| <b>Standardized MedDRA queries (SMQ)</b> | <b>Preferred term</b>                | <b>Term scope text</b> |
| nmq_hypo                                 | Hypoglycemic seizure                 | Narrow                 |
| nmq_hypo                                 | Hypoglycemic unconsciousness         | Narrow                 |
| nmq_hypo                                 | Neuroglycopenia                      | Narrow                 |
| nmq_hypo                                 | Shock hypoglycemic                   | Narrow                 |

**eTable 4. Multiple imputation tipping analysis for primary endpoint**

|                                              | <b>Insulin degludec</b> | <b>Insulin glargine U100</b> | <b>ERR [95%CI]</b> |
|----------------------------------------------|-------------------------|------------------------------|--------------------|
| <b>Completers</b>                            |                         |                              |                    |
| N                                            | 405                     | 405                          |                    |
| PYE                                          | 124.4                   | 124.5                        |                    |
| Total no. of episodes                        | 2751                    | 3073                         |                    |
| Mean no. of episodes                         | 6.8                     | 7.6                          |                    |
| Rate per 100 PYE                             | 2212.3                  | 2467.8                       |                    |
| Rate per 100 PYE – MI tipping point analysis | 1227.0                  | 1372.3                       | 0.89 [0.85; 0.94]  |
| <b>Non-completers multiple imputation</b>    |                         |                              |                    |
| N                                            | 49                      | 55                           |                    |
| PYE                                          | 15.8                    | 17.7                         |                    |
| Total no. of episodes                        | 252                     | 318                          |                    |
| Mean no. of episodes                         | 5.1                     | 5.8                          |                    |
| Rate per 100 PYE                             | 1596.0                  | 1796.6                       |                    |
| Rate per 100 PYE – MI tipping point analysis | 1183.7                  | 1316.3                       | 0.90 [0.85; 0.95]  |
| <b>Non-completers tipping point</b>          |                         |                              |                    |
| N                                            | 49                      | 55                           |                    |
| PYE                                          | 15.8                    | 17.7                         |                    |
| Total no. of episodes                        | 840.3                   | 318                          |                    |
| Mean no. of episodes                         | 17.1                    | 5.8                          |                    |
| Rate per 100 PYE                             | 5315.6                  | 1796.6                       |                    |
| Rate per 100 PYE – MI tipping point analysis | 12 episode penalty      |                              | 0.95 [0.90; 1.00]  |

CI, confidence interval; ERR, estimated rate ratio; MI, multiple imputation; N, number of patients; PYE, patient years of exposure.

For the tipping point analysis, 12 episodes are added to the values obtained from multiple imputation for all patients not completing insulin degludec.

**eTable 5. Summary of mean basal, bolus, and total insulin doses**

|                           | Treatment sequence |                    |
|---------------------------|--------------------|--------------------|
|                           | IDeg/IGlar (Units) | IGlar/IDeg (Units) |
| <b>Basal insulin</b>      |                    |                    |
| Baseline                  | 29 (18)            | 24 (14)            |
| End of treatment period 1 | 39 (30)            | 36 (22)            |
| End of treatment period 2 | 41 (34)            | 37 (26)            |
| <b>Bolus insulin</b>      |                    |                    |
| Baseline                  | 28 (17)            | 25 (16)            |
| End of treatment period 1 | 31 (28)            | 29 (22)            |
| End of treatment period 2 | 32 (28)            | 30 (23)            |
| <b>Total insulin</b>      |                    |                    |
| Baseline                  | 53 (30)            | 46 (26)            |
| End of treatment period 1 | 69 (53)            | 63 (36)            |
| End of treatment period 2 | 69 (54)            | 64 (41)            |

Data are mean (standard deviation) for the safety analysis set. IDeg, insulin degludec; IGlar, insulin glargine U100.

**eTable 6. Summary of adverse events occurring during treatment periods 1 and 2**

|                                               | <b>IDeg<br/>(n=454)<br/>PYE=259.2</b> |          |          |                                       | <b>IGlar<br/>(n=460)<br/>PYE=261.4</b> |          |          |                                       |
|-----------------------------------------------|---------------------------------------|----------|----------|---------------------------------------|----------------------------------------|----------|----------|---------------------------------------|
|                                               | <b>n</b>                              | <b>%</b> | <b>E</b> | <b>Rate/<br/>100 PYE<br/>[95% CI]</b> | <b>n</b>                               | <b>%</b> | <b>E</b> | <b>Rate/<br/>100 PYE<br/>[95% CI]</b> |
| AEs                                           | 294                                   | 64.8     | 925      | 356.8<br>[333.9;<br>379.8]            | 310                                    | 67.4     | 937      | 358.5<br>[335.5; 381.4]               |
| Serious AEs                                   | 58                                    | 12.8     | 101      | 39.0 [31.4;<br>46.6]                  | 70                                     | 15.2     | 118      | 45.1 [37.0;<br>53.3]                  |
| Severe AEs                                    | 43                                    | 9.5      | 68       | 26.2 [20.0;<br>32.5]                  | 67                                     | 14.6     | 113      | 43.2 [35.3;<br>51.2]                  |
| AEs probably related to trial product         | 28                                    | 6.2      | 48       | 18.5 [13.3;<br>23.8]                  | 29                                     | 6.3      | 44       | 16.8 [11.5;<br>21.8]                  |
| Serious AEs probably related to trial product | 16                                    | 3.5      | 28       | 10.8 [6.8;<br>14.8]                   | 20                                     | 4.3      | 30       | 11.5 [7.4;<br>15.6]                   |

Data are for safety analysis set. AE, adverse event; CI, confidence interval; E, number of events; IDeg, insulin degludec; IGlar, insulin glargine U100; n, number of patients with events; PYE, patient-years of exposure; Rate, unadjusted event rate (events/100 PYE); %, proportion of patients with events.
